# Supplementary material for: Association between plasma levels of BDNF and the antisuicidal effects of repeated ketamine infusions in depression with suicidal ideation
Source: PubMed Central journal article supplement — Ther Adv Psychopharmacol. 2020 Nov 25;10:2045125320973794. doi: 10.1177/2045125320973794 (PMC7692352; doi:10.1177/2045125320973794), 2020-11-25
Supplement: sj-pdf-1-tpp-10.1177_2045125320973794.pdf [file sj-pdf-1-tpp-10.1177_2045125320973794.pdf]

**Supplemental Table 1.** Comparison of suicidal scores and plasma levels of BDNF between antisuicidal responders and nonresponders in TRD patients with suicidal ideation using linear mixed model analysis.

| Variables                     | Group-by-time interaction |              | Time main effect |                  | Group main effect |              |
|-------------------------------|---------------------------|--------------|------------------|------------------|-------------------|--------------|
|                               | F                         | p            | F                | p                | F                 | p            |
| HAMD item 3 scores            | 0.9                       | 0.434        | 29.5             | <b>&lt;0.001</b> | 10.5              | <b>0.001</b> |
| MADRS item 10 scores          | 3.1                       | <b>0.035</b> | 18.5             | <b>&lt;0.001</b> | 4.4               | <b>0.042</b> |
| SSI scores                    | 6.1                       | <b>0.001</b> | 18.8             | <b>&lt;0.001</b> | 10.8              | <b>0.001</b> |
| Plasma levels of BDNF (ng/ml) | 0.7                       | 0.502        | 1.9              | 0.155            | 0.1               | 0.790        |

Bolded values are  $p < 0.05$ .  
Abbreviations: BDNF=brain-derived neurotrophic factor; SSI=Beck's Scale for Suicide Ideation;; MADRS=the Montgomery-Asberg Depression Rating Scale; HAMD=the Hamilton Depression Rating Scale; TRD=treatment refractory depression.

**Supplemental Table 2.** Correlation analysis between suicidal ideation scores and plasma levels of BDNF in TRD patients with suicidal ideation at the indicated times.

| Variables                                                                                                                                                                                                                                   |          | Reduction in SSI-part 1 scores |         |         | Reduction in scores on item 10 of the MADRS |         |         | Reduction in scores on item 3 of the HAMD |         |         |
|---------------------------------------------------------------------------------------------------------------------------------------------------------------------------------------------------------------------------------------------|----------|--------------------------------|---------|---------|---------------------------------------------|---------|---------|-------------------------------------------|---------|---------|
|                                                                                                                                                                                                                                             |          | at 1 d                         | at 13 d | at 26 d | at 1 d                                      | at 13 d | at 26 d | at 1 d                                    | at 13 d | at 26 d |
| Change in plasma levels of BDNF (ng/ml)                                                                                                                                                                                                     | <i>r</i> | -0.087                         | -0.048  | 0.193   | -0.037                                      | -0.032  | 0.165   | 0.104                                     | 0.117   | 0.104   |
|                                                                                                                                                                                                                                             | <i>p</i> | 0.615                          | 0.780   | 0.260   | 0.810                                       | 0.836   | 0.285   | 0.544                                     | 0.495   | 0.544   |
| Variables                                                                                                                                                                                                                                   |          | SSI-part 1 scores              |         |         | Scores on item 10 of the MADRS              |         |         | Scores on item 3 of the HAMD              |         |         |
|                                                                                                                                                                                                                                             |          | at 1 d                         | at 13 d | at 26 d | at 1 d                                      | at 13 d | at 26 d | at 1 d                                    | at 13 d | at 26 d |
| Plasma BDNF levels at baseline (ng/ml)                                                                                                                                                                                                      | <i>r</i> | 0.024                          | -0.121  | -0.005  | 0.071                                       | -0.146  | -0.061  | -0.005                                    | -0.115  | -0.003  |
|                                                                                                                                                                                                                                             | <i>p</i> | 0.880                          | 0.432   | 0.975   | 0.647                                       | 0.343   | 0.695   | 0.975                                     | 0.455   | 0.986   |
| Abbreviations: BDNF=brain-derived neurotrophic factor; <i>r</i> =Pearson coefficient of correlation; SSI=Beck's Scale for Suicide Ideation; MADRS=the Montgomery-Asberg Depression Rating Scale; HAMD=the Hamilton Depression Rating Scale. |          |                                |         |         |                                             |         |         |                                           |         |         |

**Supplemental Figure 1.** The antisuicidal effects of ketamine as measured by SSI part 1, item 10 of the MADRS, and item 3 of the HAMD in TRD patients with suicidal ideation.

**A**

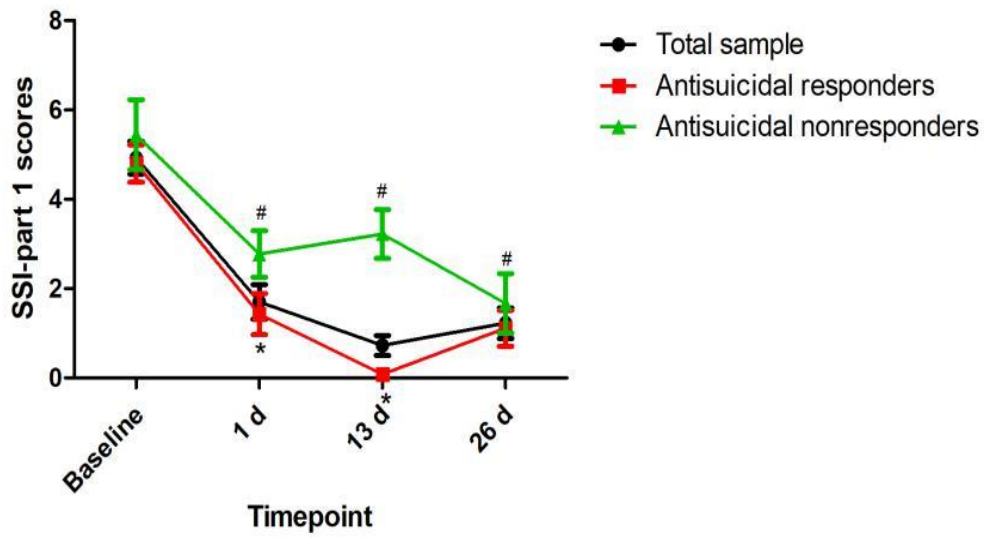

**B**

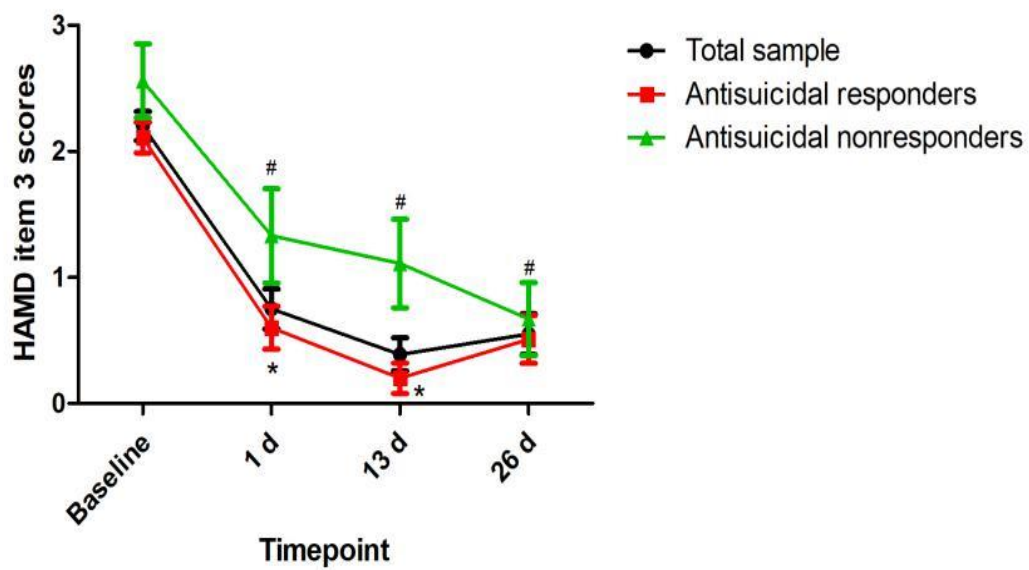

**C**

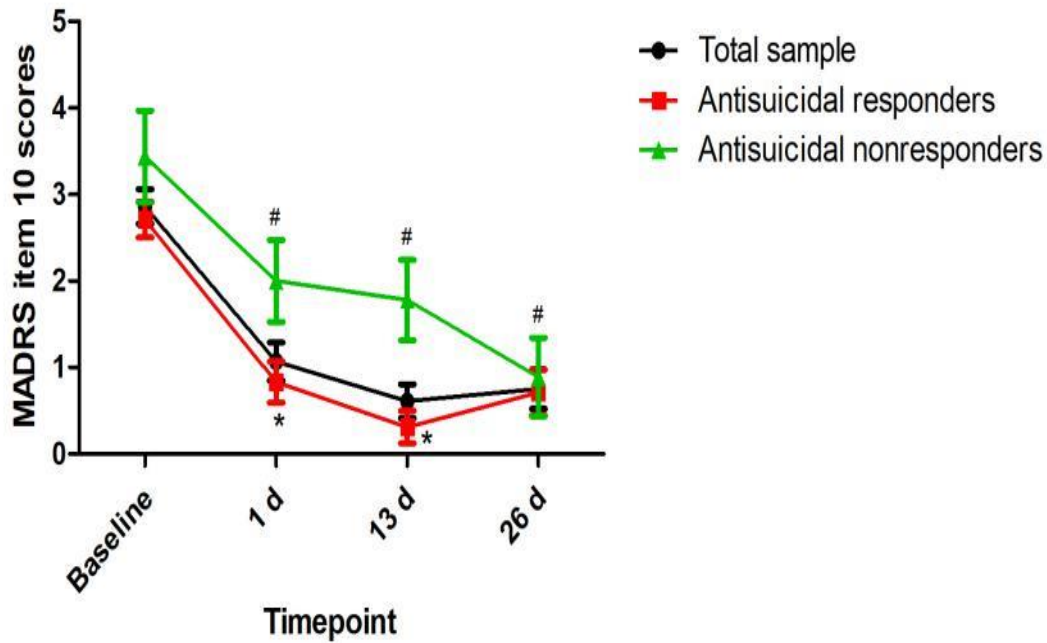

#Significant difference was found when compared with baseline scores at the indicated times ( $p < 0.05$ ).

\*Significant difference was found between responders and nonresponders at the indicated times ( $p < 0.05$ ).

A: SSI part 1, B: item 3 of the HAMD, C: item 10 of the MADRS.

Abbreviations: SSI=Beck's Scale for Suicide Ideation; MADRS=the Montgomery-Asberg Depression Rating Scale; HAMD=the Hamilton Depression Rating Scale; TRD=treatment refractory depression.

**Supplemental Figure 2.** Change in plasma levels of BDNF in TRD patients with suicidal ideation at the indicated times.

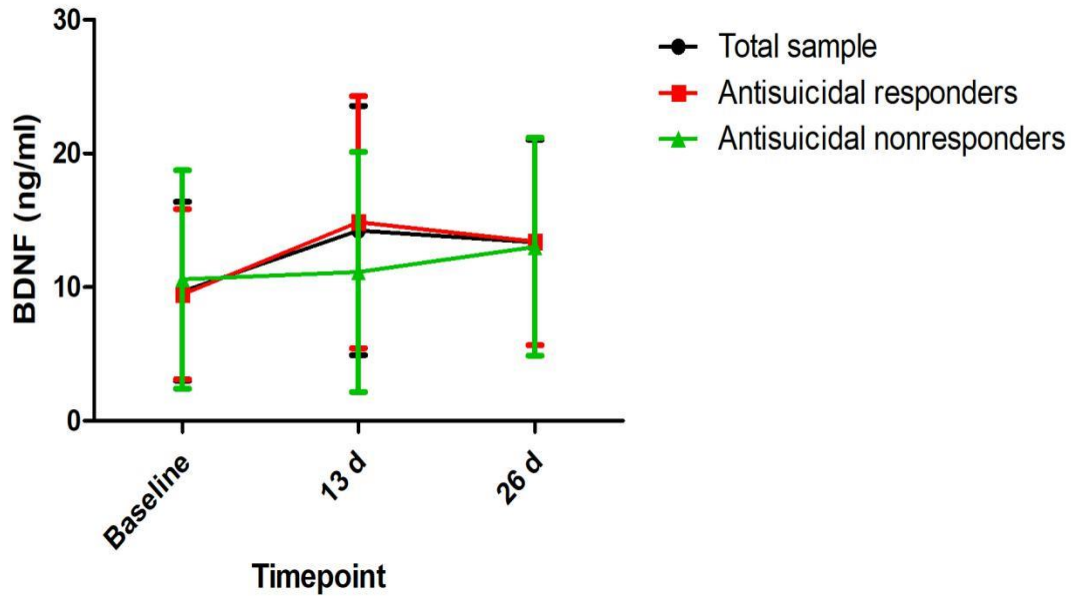

Notes: no significant difference at the indicated times was found when compared with baseline levels across the total sample, including responders and nonresponders, and no significant difference at the indicated times was found between responders and nonresponders.

Abbreviations: BDNF=brain-derived neurotrophic factor; TRD=treatment refractory depression.
